# Supplementary material for: Fibrosis index predicts variceal bleeding and reduces need for nonselective beta-blocker in compensated cirrhosis with initial small esophageal varices without red-color sign
Source: PubMed Central journal article supplement — Ann Transl Med. 2020 Oct;8(19):1223. doi: 10.21037/atm-20-2444 (PMC7607085; doi:10.21037/atm-20-2444), 2020-10
Supplement: atm-08-19-1223-dss.pdf [file atm-08-19-1223-dss.pdf]

## Data Sharing Statement

|                     |                                                                                                                                                    |                                                                                                            |
|---------------------|----------------------------------------------------------------------------------------------------------------------------------------------------|------------------------------------------------------------------------------------------------------------|
| <b>Article Info</b> | <a href="http://dx.doi.org/10.21037/atm-20-2444">http://dx.doi.org/10.21037/atm-20-2444</a>                                                        |                                                                                                            |
| <b>Item</b>         | <b>Question</b>                                                                                                                                    | <b>Authors' Response<br/>(place "-" if not applicable)</b>                                                 |
| 1                   | Would you like to share data collected for your study to others?                                                                                   | It is obtained from CGRD database, which could not allowed sharing due to privacy policy of the hospitals. |
| 2                   | If not, would you like to share the reason for your decision?                                                                                      | - It is from CGRD database, which could not be shared.                                                     |
| 3                   | What data in particular will be shared?                                                                                                            | None could be shared                                                                                       |
| 4                   | Any other documents will be share? Such as study protocol, statistical analysis plan, informed consent form, clinical study report, analytic code. | Statistical analysis plan will also be shared if requested.                                                |
| 5                   | When will data availability begin?                                                                                                                 | N/A                                                                                                        |
| 6                   | When will data availability end?                                                                                                                   | N/A                                                                                                        |
| 7                   | To whom will you share the data?                                                                                                                   | N/A                                                                                                        |
| 8                   | For what type of analysis or purpose?                                                                                                              | N/A                                                                                                        |
| 9                   | How or where can the data/documents be obtained?                                                                                                   | N/A                                                                                                        |
| 10                  | Any other restrictions?                                                                                                                            | N/A                                                                                                        |
